# Supplementary material for: Conservation Assessment and Chemistry of Boswellia ogadensis, a Critically Endangered Frankincense Tree
Source: MDPI journal article supplement (doi:10.3390/plants11233381), 2022-12-05
Supplement: s1 [file s1]

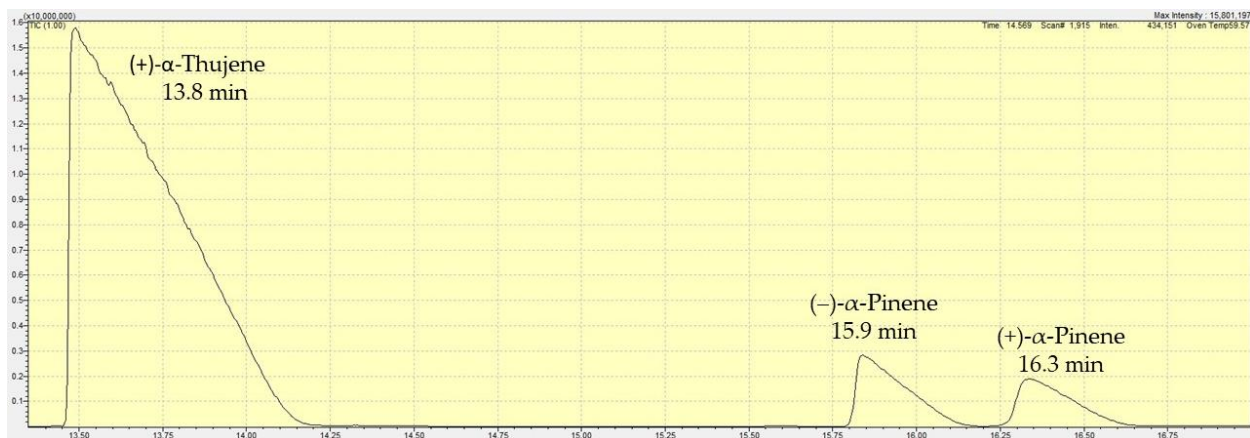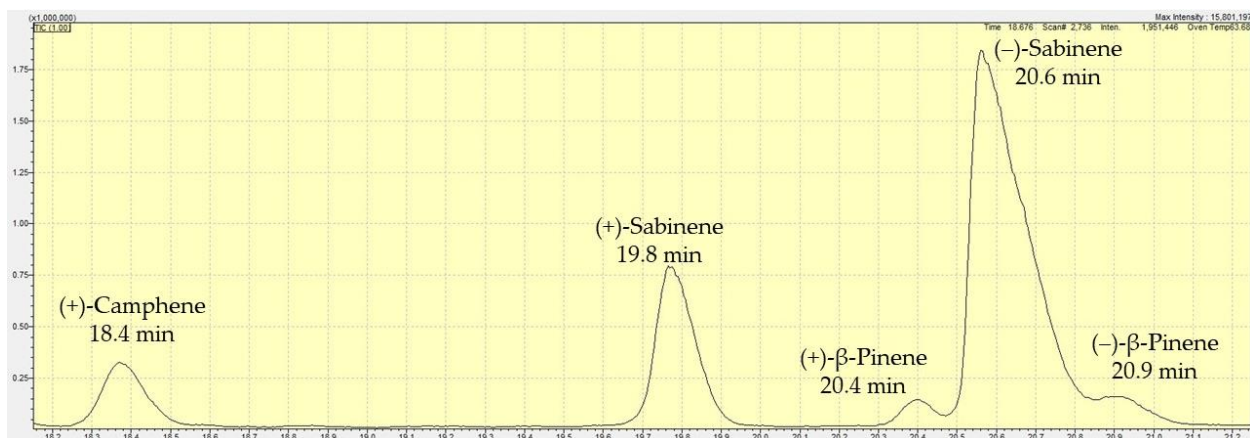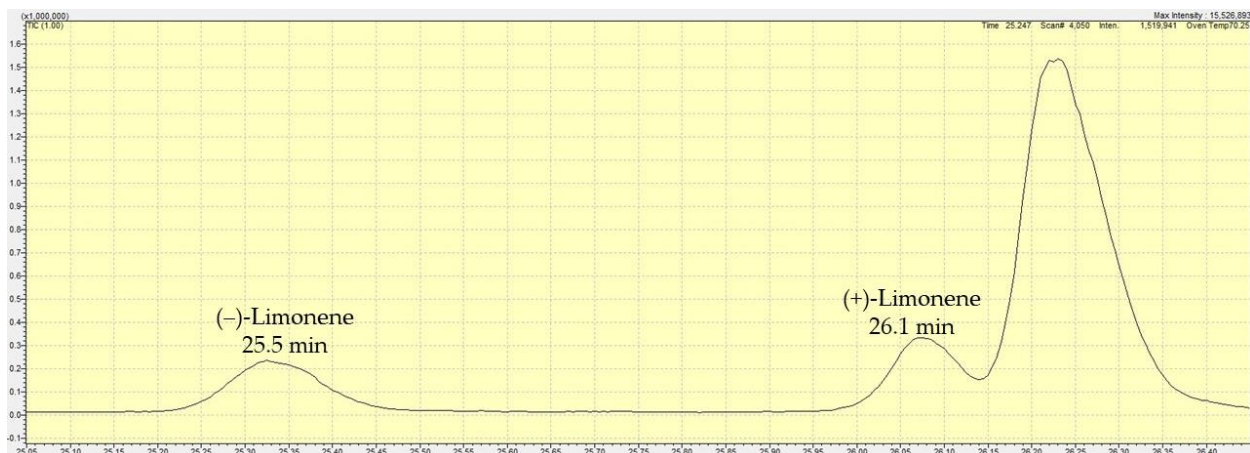

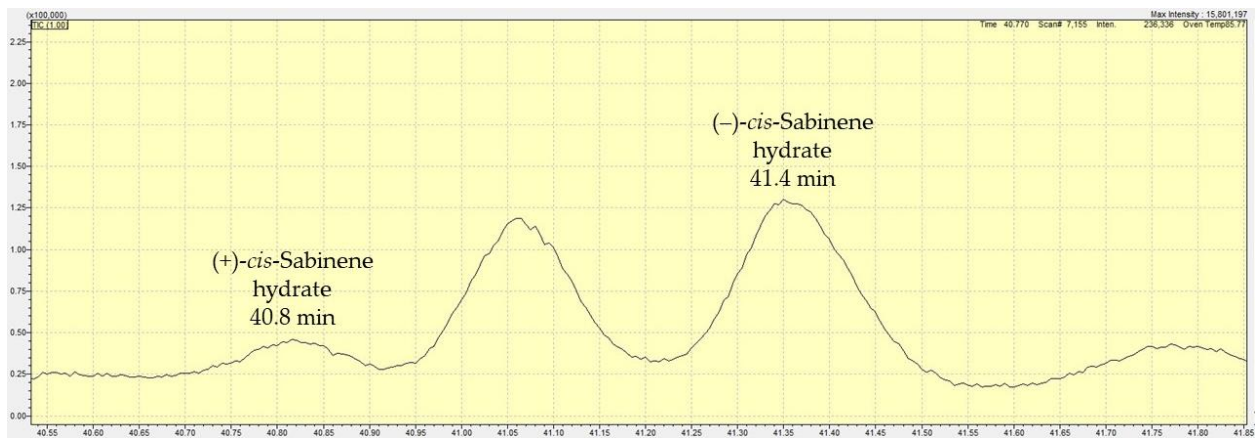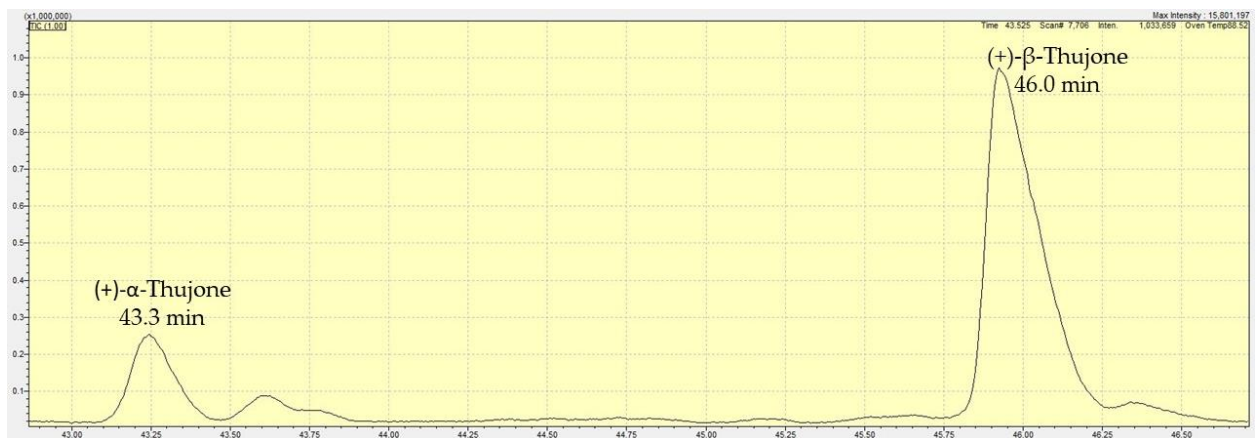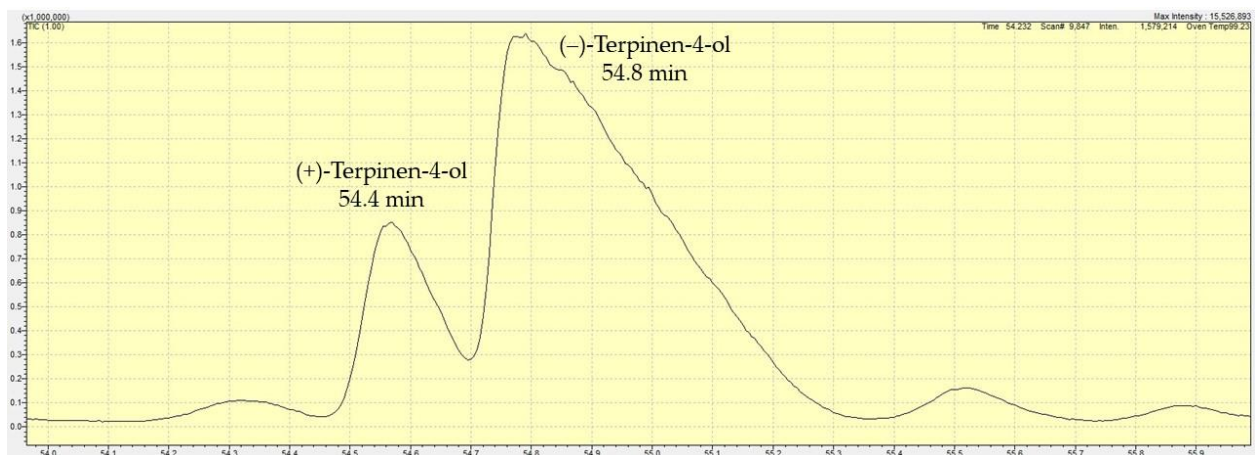

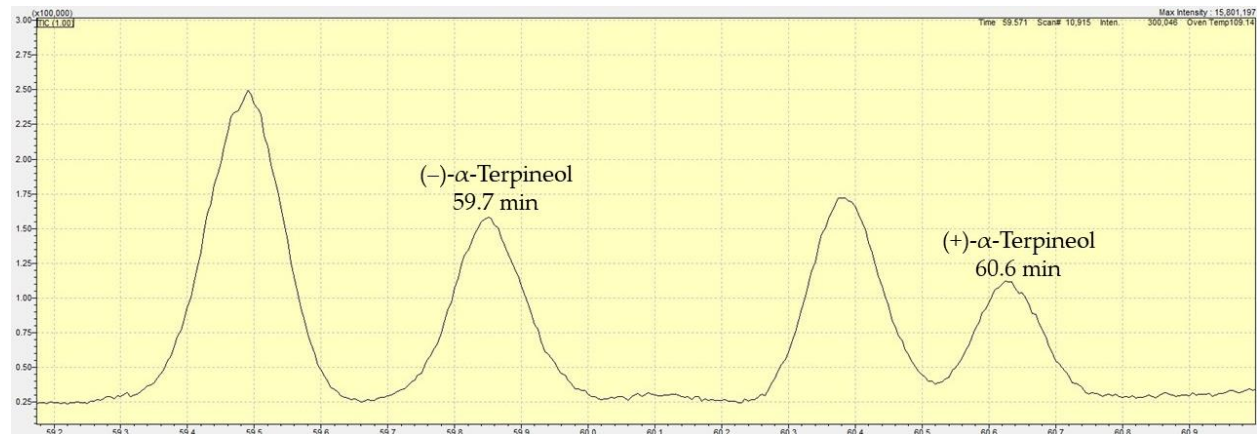

**Supplementary Figure S2.** Chiral gas chromatogram of *Boswellia ogadensis* oleogum resin essential oil.
